# Supplementary material for: CO2 and CH4 permeation through zeolitic imidazolate framework (ZIF)-8 membrane synthesized via in situ layer-by-layer growth: an experimental and modeling study
Source: Royal Society of Chemistry journal article supplement (doi:10.1039/c5ra12813g), 2015-01-01
Supplement: c5ra12813g1.pdf [file c5ra12813g1.pdf]

Supporting information:

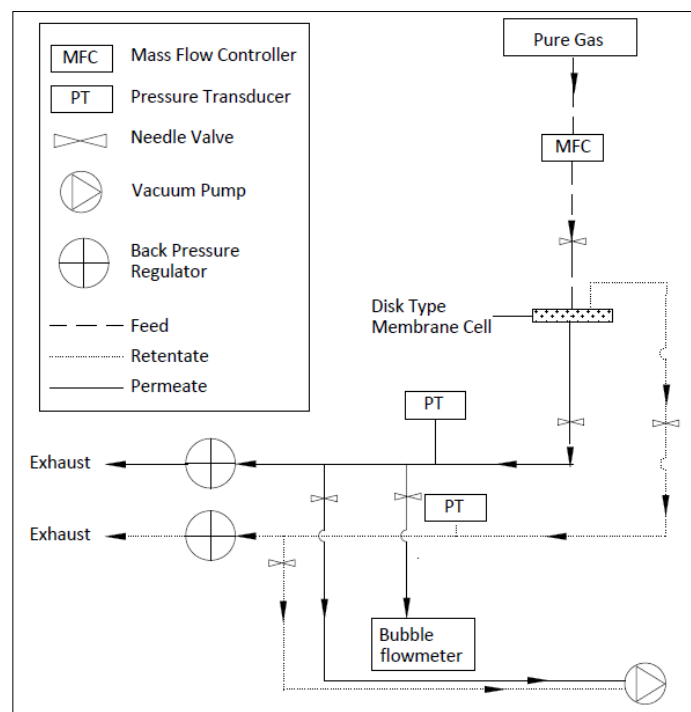

**Fig. S1** Schematic of the gas permeation setup.

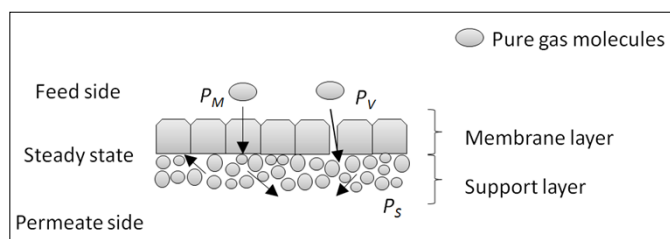

**Fig. S2** Illustration of single gas permeation through ZIF-8 membrane layer, intercrystalline pores and support layer.
